# Supplementary material for: Chondroprotection by urocortin involves blockade of the mechanosensitive ion channel Piezo1
Source: PubMed Central journal article supplement (PMC5505992; doi:10.1038/s41598-017-04367-4), 2017-07-11
Supplement: 41598_2017_4367_MOESM1_ESM.pdf [file 41598_2017_4367_MOESM1_ESM.pdf]

# **Chondroprotection by urocortin involves blockade of the mechanosensitive ion channel Piezo1.**

**K.M. Lawrence\*<sup>1</sup>, R.C. Jones<sup>1</sup>, T.R. Jackson<sup>1</sup>, R.L. Baylie<sup>2</sup>, B. Abbott<sup>1</sup>, B. Bruhn-Olszewska<sup>1</sup>, T.N. Board<sup>3</sup>, I.C Locke<sup>4</sup>, S.M. Richardson<sup>5</sup>, P.A Townsend<sup>1</sup>**

Supplementary information

| <b>Gender</b> | <b>Age</b> | <b>Joint</b> |
|---------------|------------|--------------|
| Female        | 47         | Hip          |
| Female        | 56         | Hip          |
| Male          | 68         | Hip          |
| Female        | 76         | Knee         |
| Female        | 55         | Knee         |
| Female        | 64         | Hip          |
| Male          | 26         | Hip          |
| Female        | 55         | Knee         |
| Female        | 50         | Hip          |
| Male          | 29         | Hip          |
| Male          | 69         | Hip          |

**Table S1:** Patient demographics.

| Target Gene | Sense Primer Sequence 5'-3' | Anti-sense Primer Sequence 5'-3' | Length of fragment (bp) | PCR protocol   | Cycles |
|-------------|-----------------------------|----------------------------------|-------------------------|----------------|--------|
| UCN1        | CAGGCGAGCGGCCGCG            | CTTGCCCACCGAGTCGAAT              | 146                     | 95°C/57°C/60°C | 33     |
| CRF-R1      | ACAAACAATGGCTACCGGGA        | GGACCACGAACCAGGTGGCG             | 280                     | 95°C/58°C/60°C | 45     |
| CRF-R2      | AGCCCATTTTGGATGACAAG        | AGGTGGTGATGAGGAGGCC              | 180                     | 95°C/58°C/60°C | 45     |

**Table S2:** PCR primer sequences and conditions used to amplify the Ucn1 system components in AC.

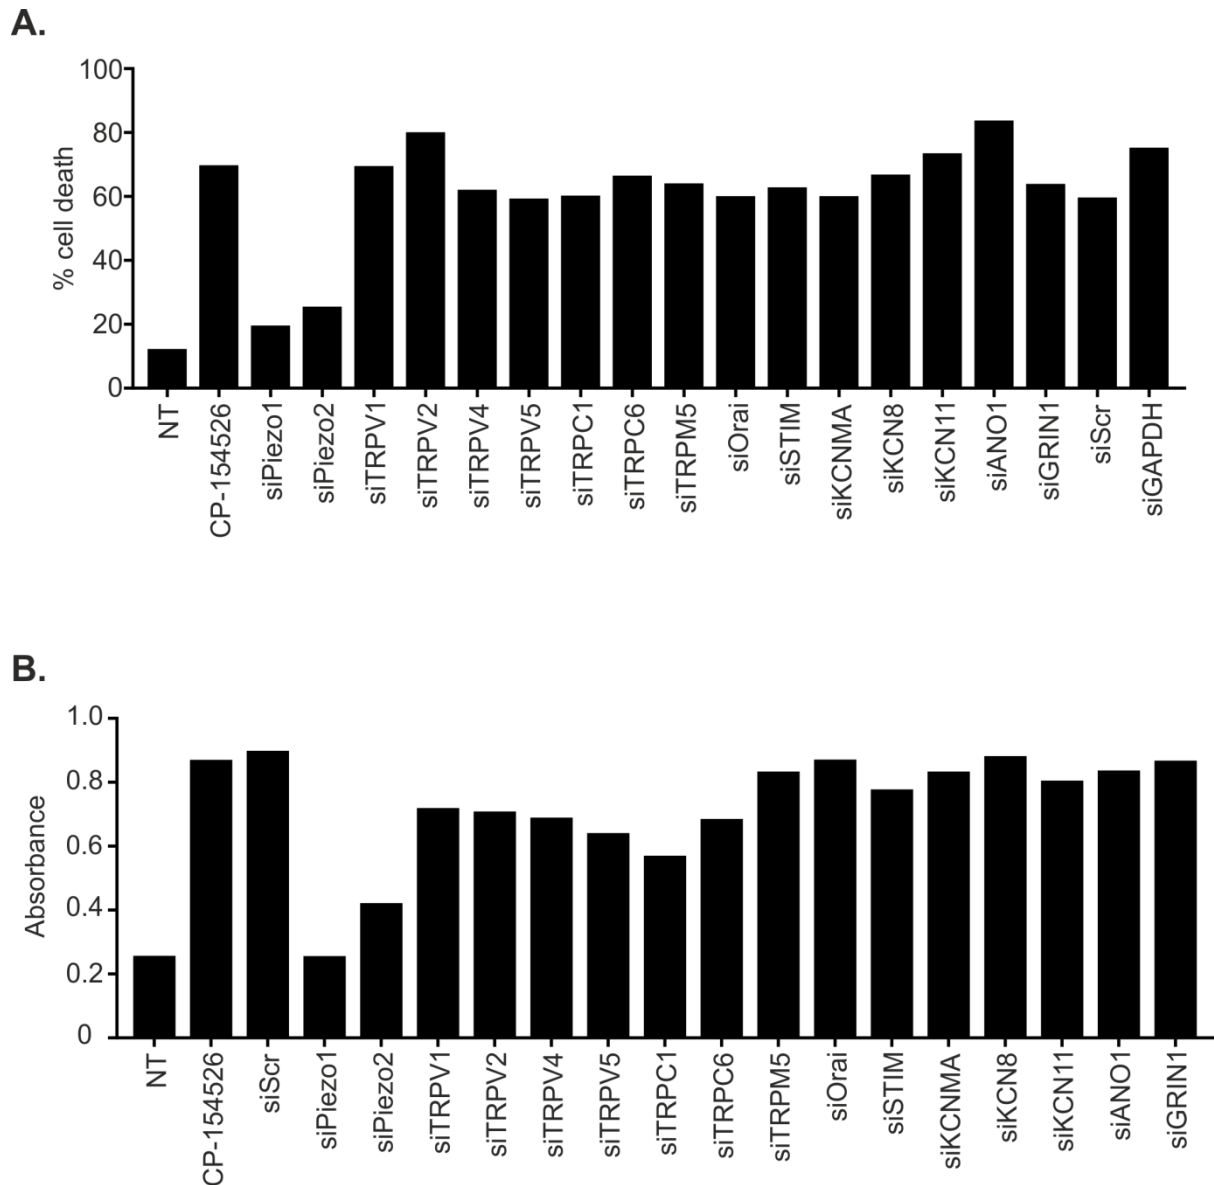

**Figure S1:** A bespoke panel of siRNA selected against 16 candidate ion channels derived from an extensive literature search was used to screen potential candidates for the ion channel modulated by Ucn1 in this system. C-20/A4 cells were transfected in the presence of HiPerFect and cultured for 72h before addition of CP-154526 (50 $\mu$ M). Cells and media were collected separately at 5h. A.) Transfected C-20/A4 cells were stained with AnnexinV/PI and levels of cell death assessed by flow cytometry. Representative data for 2 independent experiments is shown. B.) Media from cells following treatment with CP-154526 was collected and LDH levels assessed at absorbance of 490nm. Mean absorbance minus background is reported, representative data for 2 independent experiments is shown.

| siRNA         | Sequence             | siRNA                                          | Sequence             |
|---------------|----------------------|------------------------------------------------|----------------------|
| <b>PIEZO1</b> | AAAGACAGAUGGAGCGUAU  | <b>ORAI1</b>                                   | GCUCACUGGUUAGCCAUAA  |
|               | GCAAGACCGUGCUGGGCAA  |                                                | GGCCUGAUCUUUAUCGUCU  |
|               | UCGCGGUGGUCGUCAAGUA  |                                                | GCACCUGUUUGCGCUCAUG  |
|               | GCAAGUUCGUGCGCGGAUU  |                                                | CAGCAUUGAGUGUGUACAU  |
| <b>PIEZO2</b> | GGAAUUCACUUCUGGAUGU  | <b>STIM1</b>                                   | CAUCAGAAGUAUACAAUUG  |
|               | GCUAUGGUAUUAUGGGAUU  |                                                | AGAAGGAGCUAGAAUCUCA  |
|               | UUACGUCAACCUCUUCUUA  |                                                | AGGUGGAGGUGCAAUAUUA  |
|               | CACCGGUGCUAUGCAAUUU  |                                                | GGUGGUGUCUAUCGUUAUU  |
| <b>TRPV1</b>  | GGAGACUAUUUCCGAGUUA  | <b>KCNMA1</b>                                  | GAAGGAGUCUCAAUGAAA   |
|               | UGACGAGCAUGUACAAUGA  |                                                | GAACUACCAUCCGAAGUA   |
|               | CAUCUAUGCCGUCAUGAUA  |                                                | GCAAAGCUCUGAAAACAUA  |
|               | CGAGGAAGUUUAUCUGCGA  |                                                | GAUCCAAGAAGGUACUUUA  |
| <b>TRPV2</b>  | GGUAAGACGUGCCUGAUGA  | <b>KCNJ8</b>                                   | GCACGAACCUCCUACAUUG  |
|               | GAAAUGGGAUCUGCUCAUC  |                                                | GAGAAACCUUCCAUCCUUA  |
|               | GGCUGAACCGUCUUUACUA  |                                                | GAACAUCCGUGAGCAAGGA  |
|               | GCGAGACCGUCAACAGUGU  |                                                | GGUCAUAGUUUAUCUGGAA  |
| <b>TRPV4</b>  | GCACACCGCCGUACCCUUA  | <b>KCNJ11</b>                                  | GCAACGUGGCCCAACAAGAA |
|               | GACCAAUCUGCGCAUGAA   |                                                | CGCAAGAGCAUGAUCAUCA  |
|               | CAACCGGCCUAUCCUCUUU  |                                                | ACAUGCAGGUGGUACGCAA  |
|               | GAACCCGUGUGCCAACAUG  |                                                | GACGUUACUCUGUGGACUA  |
| <b>TRPV5</b>  | GAGAGGAGGUCUACCAUUU  | <b>ANO1</b>                                    | GCAGAGAGGCCGAGUUUCU  |
|               | GAACCACAAUGAUCAGAAU  |                                                | GCACGAUUGUCUAUGAGAU  |
|               | GUAUUUCACUCGAGGAUUC  |                                                | UUACGUGGCGUUCUUCAAA  |
|               | UAGCAGCCCUCUAUGACAA  |                                                | GUACGCGGCUGCAUACCCA  |
| <b>TRPC1</b>  | GAACAUAAAUUGCGUAGAU  | <b>GRIN1</b>                                   | GCCGGGAUCUCCUGAUUU   |
|               | GGACUACGGUUGUCAGAAA  |                                                | AAGCAGAGCUCCGUGGAUA  |
|               | GAGAAGAACUGCAGUCCUU  |                                                | GGAGCACGCUGGACUCGUU  |
|               | UCAGGUGACUUGAACAUAA  |                                                | AGACGUGGGUUCGGUAUCA  |
| <b>TRPC6</b>  | GCACAAAACUCCUUCCUAA  | <b>ON-TARGETplus<br/>GAPDH<br/>Control</b>     | GUGUGAACCACGAGAAAUA  |
|               | GGACACGGUUCUCCCAUGA  |                                                | GGAGAAACCUGCCAAGUAU  |
|               | GCAGAUUAUCACUUGGAAGA |                                                | UCAAGAAGGUGGUGAAGCA  |
|               | UGAACGGCCUCAUGAUUAU  |                                                | UGGUGAAGCAGGCAUCUGA  |
| <b>TRPM5</b>  | GGGCAACGCAGACAUGUUC  | <b>ON-TARGETplus<br/>Scrambled<br/>Control</b> | UGGUUUACAUGUCGACUAA  |
|               | GUACUUCGCCUCCUCUUC   |                                                | UGGUUUACAUGUUGUGUGA  |
|               | GAAGAAGUUCACACUGUAU  |                                                | UGGUUUACAUGUUUUCUGA  |
|               | GAGCAGCCUUUCGCCAUGA  |                                                | UGGUUUACAUGUUUUCUA   |

**Table S3:** siRNA sequences used in the transfection experiments for the 16 different ion channel species as indicated.
